# Supplementary material for: Construction and Validation of a Prognostic Model of Gastric Cancer with 10RBPs Based on 6 Microarrays
Source: Research Square preprint supplement (doi:10.21203/rs.3.rs-117996/v1), 2020-12-07
Supplement: Supplementary file 1 [file 24050dc63d7f63ee9c801b50.docx]

Table S1 Differentially expressed RBPs 61 probes

| **Gene ID** | **Probe ID** | **LogFC** | **P.Value** | **adj.P.Val** | **Source Reference ID** | **Entrez ID** |
| --- | --- | --- | --- | --- | --- | --- |
| ACO1 | ILMN_1750800 | -0.66 | 2.13E-43 | 4.58E-41 | NM_002197 | 48 |
| ACTN1 | ILMN_2232177 | 0.68 | 2.15E-18 | 7.70E-17 | NM_001102 | 87 |
| ANG | ILMN_1696974 | -1.23 | 2.25E-35 | 2.93E-33 | NM_001097577 | 283 |
| ANG | ILMN_1760727 | -1.28 | 4.15E-39 | 6.80E-37 | NM_001097577 | 283 |
| ANXA1 | ILMN_2184184 | 0.84 | 3.21E-19 | 1.24E-17 | NM_000700 | 301 |
| APOBEC2 | ILMN_1719143 | -1.07 | 1.01E-34 | 1.26E-32 | NM_006789 | 10930 |
| AUH | ILMN_2231911 | -0.77 | 1.22E-39 | 2.11E-37 | NM_001698 | 549 |
| AZGP1 | ILMN_1797154 | -0.98 | 2.79E-21 | 1.32E-19 | NM_001185 | 563 |
| CD55 | ILMN_1800540 | 0.68 | 1.63E-10 | 2.45E-09 | NM_000574 | 1604 |
| CDC20 | ILMN_1663390 | 0.80 | 4.01E-14 | 9.29E-13 | NM_001255 | 991 |
| CIRBP | ILMN_1674661 | -0.78 | 5.32E-37 | 7.55E-35 | NM_001280 | 1153 |
| COL5A2 | ILMN_1729117 | 1.48 | 3.87E-49 | 1.15E-46 | NM_000393 | 1290 |
| CPEB3 | ILMN_1755954 | -0.64 | 1.50E-38 | 2.38E-36 | NM_014912 | 22849 |
| CPS1 | ILMN_1792748 | 0.65 | 2.23E-03 | 1.03E-02 | NM_001875 | 1373 |
| DAP3 | ILMN_1781680 | 1.10 | 2.72E-70 | 2.90E-67 | NM_033657 | 7818 |
| DAZ4 | ILMN_2404951 | -1.21 | 7.94E-13 | 1.59E-11 | NM_020420 | 57135 |
| DAZ4 | ILMN_1754528 | -1.30 | 6.16E-14 | 1.40E-12 | NM_020420 | 57135 |
| DAZAP1 | ILMN_1746257 | 0.65 | 4.60E-34 | 5.54E-32 | NM_170711 | 26528 |
| DDX60 | ILMN_1795181 | -0.79 | 1.82E-17 | 5.92E-16 | NM_017631 | 55601 |
| DHCR24 | ILMN_1725510 | -0.71 | 2.28E-19 | 9.01E-18 | NM_014762 | 1718 |
| DHX32 | ILMN_1713688 | -0.66 | 3.60E-35 | 4.63E-33 | NM_018180 | 55760 |
| EEF1A2 | ILMN_2108735 | -1.38 | 2.75E-22 | 1.39E-20 | NM_001958 | 1917 |
| EIF1AY | ILMN_1755537 | -0.71 | 1.27E-04 | 7.77E-04 | NM_004681 | 9086 |
| EIF4G1 | ILMN_2370772 | 0.96 | 5.39E-52 | 1.94E-49 | NM_198244 | 1981 |
| EIF6 | ILMN_1787410 | 0.91 | 3.66E-42 | 7.14E-40 | NM_181466 | 3692 |
| FAM46A | ILMN_1740466 | -0.81 | 2.71E-27 | 2.05E-25 | NM_017633 | 55603 |
| HADH | ILMN_1719906 | -0.83 | 9.38E-47 | 2.49E-44 | NM_005327 | 3033 |
| HSPH1 | ILMN_1712888 | 0.59 | 5.10E-19 | 1.93E-17 | NM_006644 | 10808 |
| IER5L | ILMN_1755620 | 0.64 | 3.27E-18 | 1.15E-16 | NM_203434 | 389792 |
| IFIT2 | ILMN_1739428 | 0.61 | 3.40E-12 | 6.30E-11 | NM_001547 | 3433 |
| IFIT3 | ILMN_1701789 | 0.59 | 6.95E-11 | 1.08E-09 | NM_001031683 | 3437 |
| IGF2BP3 | ILMN_1807423 | 1.11 | 4.95E-16 | 1.41E-14 | NM_006547 | 10643 |
| ISG20 | ILMN_1659913 | -0.70 | 6.71E-16 | 1.87E-14 | NM_002201 | 3669 |
| ITGB1 | ILMN_2383934 | 0.63 | 7.36E-16 | 2.04E-14 | NM_033669 | 3688 |
| ITGB1 | ILMN_1714820 | 0.63 | 5.94E-13 | 1.21E-11 | NM_033668 | 3688 |
| KIAA0101 | ILMN_2285996 | 0.79 | 1.33E-14 | 3.25E-13 | NM_014736 | 9768 |
| MYH11 | ILMN_1660086 | -0.85 | 2.91E-06 | 2.42E-05 | NM_002474 | 4629 |
| NKX6-2 | ILMN_1786989 | -1.70 | 5.06E-29 | 4.28E-27 | NM_177400 | 84504 |
| OASL | ILMN_1674811 | -0.71 | 2.56E-13 | 5.44E-12 | NM_198213 | 8638 |
| PABPC4 | ILMN_1757343 | -0.62 | 3.36E-33 | 3.76E-31 | NM_003819 | 8761 |
| RBPMS2 | ILMN_1808238 | -0.96 | 2.14E-12 | 4.05E-11 | NM_194272 | 348093 |
| RNASE1 | ILMN_1795183 | -1.56 | 5.28E-51 | 1.81E-48 | NM_198232 | 6035 |
| RNASE1 | ILMN_2333670 | -1.60 | 2.17E-38 | 3.37E-36 | NM_198235 | 6035 |
| RNASE4 | ILMN_2408572 | -0.99 | 3.15E-23 | 1.73E-21 | NM_194430 | 6038 |
| RNASE4 | ILMN_1776602 | -1.16 | 5.84E-33 | 6.49E-31 | NM_194431 | 6038 |
| RNASE4 | ILMN_2294978 | -1.24 | 6.07E-36 | 8.21E-34 | NM_194430 | 6038 |
| RNASE4 | ILMN_2294976 | -1.24 | 3.31E-38 | 5.07E-36 | NM_194430 | 6038 |
| RPS21 | ILMN_1800573 | 0.71 | 3.92E-26 | 2.73E-24 | NM_001024 | 6227 |
| RPS4Y1 | ILMN_1783142 | -1.03 | 1.93E-05 | 1.38E-04 | NM_001008 | 6192 |
| S100A8 | ILMN_1729801 | 0.95 | 8.50E-12 | 1.49E-10 | NM_002964 | 6279 |
| S100P | ILMN_1801216 | -1.18 | 2.88E-13 | 6.07E-12 | NM_005980 | 6286 |
| SIDT2 | ILMN_1791912 | -1.36 | 6.40E-93 | 2.10E-89 | NM_001040455 | 51092 |
| SLC4A2 | ILMN_2078389 | -0.62 | 9.67E-20 | 3.94E-18 | NM_003040 | 6522 |
| SNRPN | ILMN_2372082 | -0.73 | 6.11E-15 | 1.55E-13 | NM_022805 | 6638 |
| TOP2A | ILMN_1686097 | 1.03 | 1.14E-20 | 5.07E-19 | NM_001067 | 7153 |
| TST | ILMN_1691572 | -0.91 | 1.48E-29 | 1.33E-27 | NM_003312 | 7263 |
| TUBA1C | ILMN_1742167 | 0.59 | 2.48E-18 | 8.81E-17 | NM_032704 | 84790 |
| TUBB | ILMN_1665583 | 0.85 | 5.88E-37 | 8.32E-35 | NM_178014 | 203068 |
| TXNDC5 | ILMN_2403965 | -0.65 | 1.49E-12 | 2.89E-11 | NM_022085 | 81567 |
| TXNDC5 | ILMN_1788108 | -0.71 | 5.66E-29 | 4.76E-27 | NM_030810 | 81567 |
| UBE2T | ILMN_1711470 | 0.76 | 1.59E-20 | 6.97E-19 | NM_014176 | 29089 |

Table S2 GO enrichment analysis results

|  | **Description** | **pvalue** | **p.adjust** |
| --- | --- | --- | --- |
| BP | RNA catabolic process | 2.68E-06 | 0.000649088 |
| type I interferon signaling pathway | 2.86E-06 | 0.000649088 |
| cellular response to type I interferon | 2.86E-06 | 0.000649088 |
| response to type I interferon | 3.38E-06 | 0.000649088 |
| mRNA catabolic process | 3.34E-05 | 0.004204912 |
| regulation of mRNA stability | 3.36E-05 | 0.004204912 |
| regulation of RNA stability | 3.83E-05 | 0.004204912 |
| regulation of mRNA catabolic process | 5.31E-05 | 0.004939238 |
| cellular response to interferon-alpha | 5.96E-05 | 0.004939238 |
| negative regulation of translation | 6.42E-05 | 0.004939238 |
| negative regulation of cellular amide metabolic process | 9.15E-05 | 0.006399512 |
| defense response to virus | 0.000106249 | 0.006715232 |
| hepatocyte differentiation | 0.000113521 | 0.006715232 |
| regulation of viral genome replication | 0.000136641 | 0.007505483 |
| response to interferon-alpha | 0.000226169 | 0.011594943 |
| viral genome replication | 0.000286130 | 0.013752124 |
| regulation of mRNA metabolic process | 0.000346257 | 0.015142378 |
| response to virus | 0.000354438 | 0.015142378 |
| regulation of viral life cycle | 0.000514037 | 0.020804964 |
| regulation of translation | 0.000952001 | 0.036604439 |
| translational initiation | 0.001089113 | 0.039490477 |
| regulation of mitotic cell cycle phase transition | 0.001129767 | 0.039490477 |
| positive regulation of G1/S transition of mitotic cell cycle | 0.001294979 | 0.042976188 |
| regulation of viral process | 0.001350935 | 0.042976188 |
| regulation of cell cycle phase transition | 0.001506845 | 0.042976188 |
| regulation of cellular amide metabolic process | 0.001541793 | 0.042976188 |
| regulation of synapse organization | 0.001545748 | 0.042976188 |
| regulation of fatty acid biosynthetic process | 0.001564803 | 0.042976188 |
| regulation of symbiosis, encompassing mutualism through parasitism | 0.001628361 | 0.043179640 |
| regulation of synapse structure or activity | 0.001735471 | 0.044485896 |
| negative regulation of viral genome replication | 0.001798327 | 0.044610104 |
| positive regulation of cell cycle G1/S phase transition | 0.001859145 | 0.044677575 |
| positive regulation of alpha-beta T cell activation | 0.001983692 | 0.046226042 |
| MF | mRNA 3'-UTR binding | 0.000163583 | 0.009383492 |
| single-stranded RNA binding | 0.000185812 | 0.009383492 |
| poly(U) RNA binding | 0.000571823 | 0.017487829 |
| poly-pyrimidine tract binding | 0.000692587 | 0.017487829 |
| translation initiation factor activity | 0.001651062 | 0.033351457 |
| translation regulator activity | 0.002277376 | 0.038335824 |
